# Supplementary figures and images for: The landscape of human STR variation
Source: HighWire-hosted journal article supplement (doi:10.1101/gr.177774.114), 2014-08-18

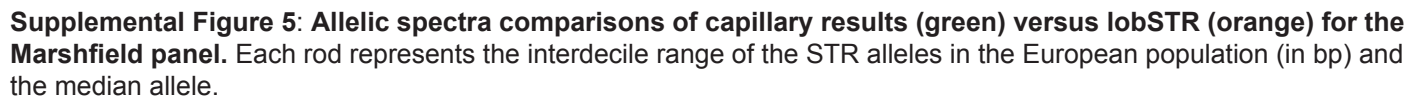

Supplement: SuppFig5.pdf [file SuppFig5.pdf]
